# Supplementary material for: The follicle-stimulating hormone triggers rapid changes in mitochondrial structure and function in porcine cumulus cells
Source: PubMed Central journal article supplement (PMC10764925; doi:10.1038/s41598-023-50586-3), 2024-01-03
Supplement: 41598_2023_50586_MOESM1_ESM.pdf [file 41598_2023_50586_MOESM1_ESM.pdf]

# **Supplemental data**

# **The follicle-stimulating hormone triggers rapid changes in mitochondrial structure and function in porcine cumulus cells**

Amel Lounas<sup>1</sup>, Yann Breton<sup>2</sup>, Ariane Lebrun<sup>1</sup>, Isabelle Laflamme<sup>1</sup>, Nathalie Vernoux<sup>3</sup>, Julie Savage<sup>3</sup>, Marie-Ève Tremblay<sup>3,4</sup>, Martin Pelletier<sup>2</sup>, Marc Germain<sup>5</sup> & François J. Richard\*<sup>1</sup>

<sup>1</sup>Centre de recherche en reproduction, développement et santé intergénérationnelle (CRDSI), Département des sciences animales, Faculté des Sciences de l'agriculture et de l'alimentation, Université Laval, Québec, Québec, G1V 0A6, Canada.

<sup>2</sup>Centre de recherche du CHU de Québec-Université Laval, Axe Maladies infectieuses et immunitaires, Département de microbiologie-infectiologie et d'immunologie, Faculté de médecine, Université Laval, Québec, Québec, G1V4G2, Canada

<sup>3</sup>Centre de recherche du CHU de Québec-Université Laval, Axe Neurosciences, Département de médecine moléculaire, Université Laval, Québec, Québec, G1V 4G2 Canada

<sup>4</sup>Division of Medical Sciences, University of Victoria, Victoria BC, V8W 2Y2 Canada

<sup>5</sup>Département de biologie médicale, Université du Québec à Trois-Rivières, Québec, G8Z 4M3, Canada.

**A**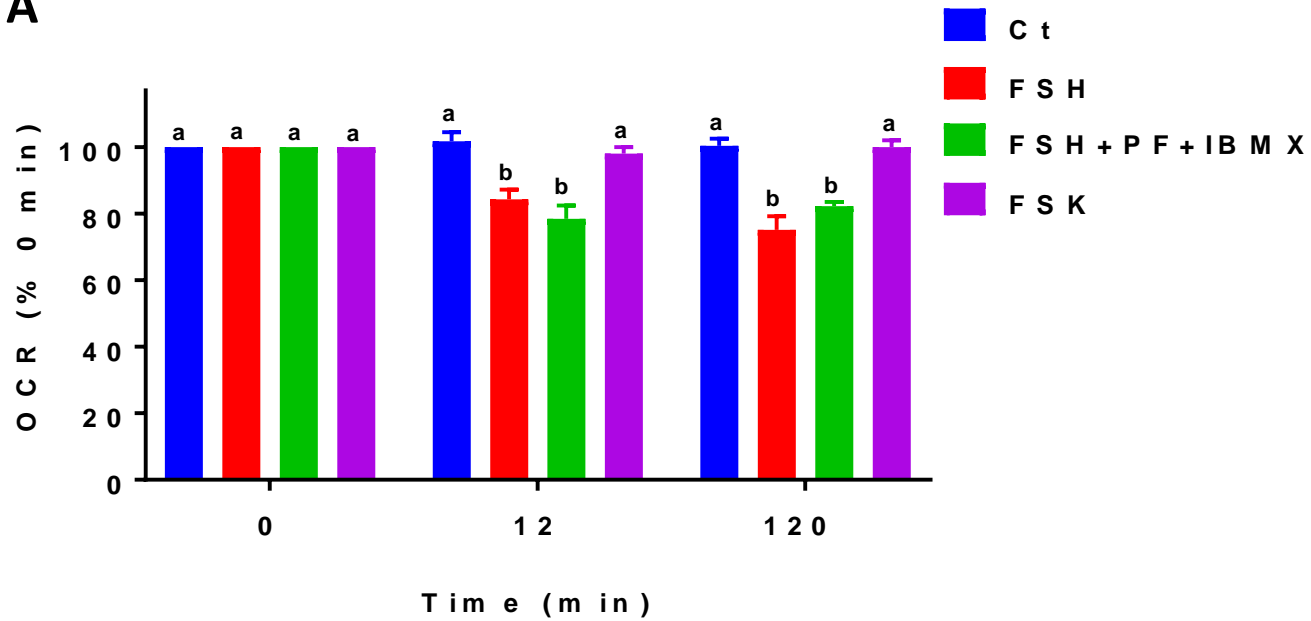**B**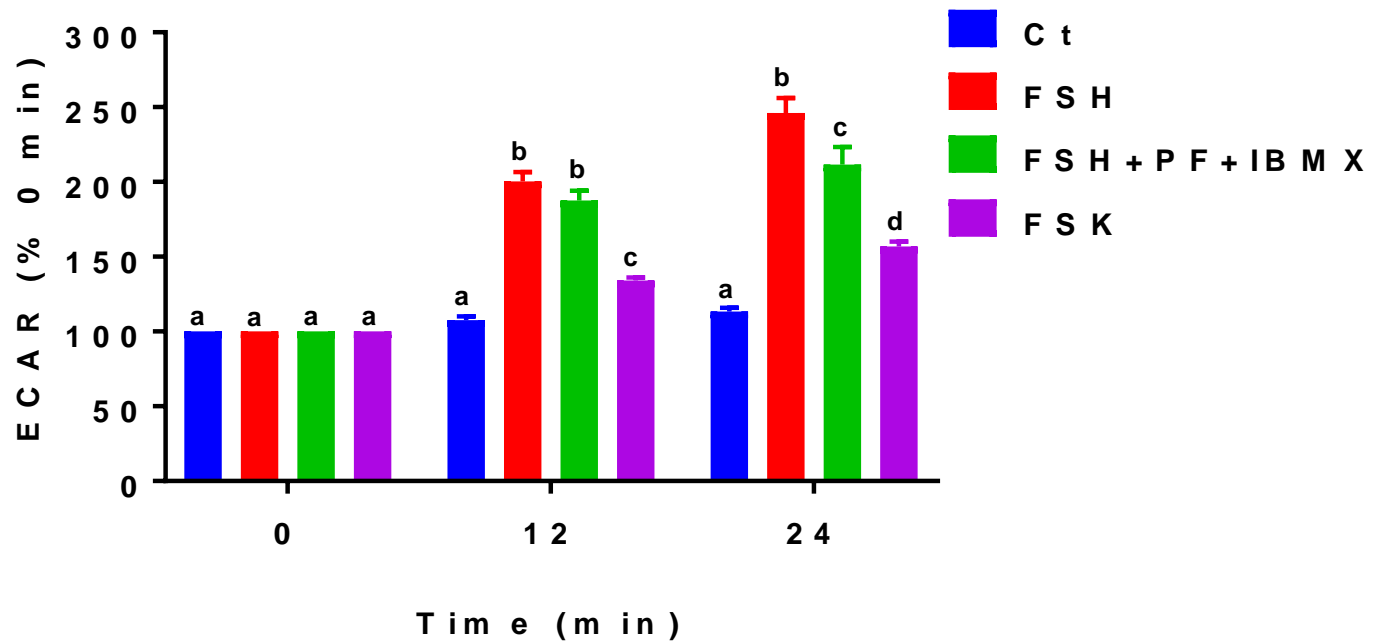

**Supplementary figure 1:** Effect of pre-IVM culture step with high cAMP levels on FSH-mediated mitochondrial response in COCs. **(A)** Changes in OCR rate percentage of COCs exposed to FSH, FSH+ PDE inhibitors, and forskolin (FSK) compared to control (Ct) for different culture periods. **(B)** Changes in ECAR rate percentage of COCs exposed to FSH, FSH+ PDE inhibitors, and FSK compared to control (Ct) for different culture periods. All data are expressed as the average of four independent experiments  $\pm$  SEM (20 COCs by well in duplicate). Different letters indicate statistically significant differences ( $p < 0.05$ ).
